# Supplementary material for: Chronic cerebral hypoperfusion shifts the equilibrium of amyloid β oligomers to aggregation-prone species with higher molecular weight
Source: PubMed Central journal article supplement (PMC6391466; doi:10.1038/s41598-019-39494-7), 2019-02-26

## Supplemental Information

Chronic cerebral hypoperfusion shifts the equilibrium of amyloid  $\beta$  oligomers to aggregation-prone species with higher molecular weight

Taro Bannai, Tatsuo Mano, Xigui Chen, Gaku Ohtomo, Ryo Ohtomo, Takeyuki Tsuchida, Kagari Koshi-Mano, Tadafumi Hashimoto, Hitoshi Okazawa, Takeshi Iwatsubo, Shoji Tsuji, Tatsushi Toda, Atsushi Iwata

### List of Figures

**Supplemental Figure S1.** BCAS decreased the area of corpus callosum with refraction

**Supplemental Figure S2.** BCAS had no effect on APP processing and A $\beta$  metabolism in APP/PS1 mice

**Supplemental Figure S3.** Serial detergent fractionation assay of APP/PS1 mice brain after sham- or BCAS operation.

(a) KB staining

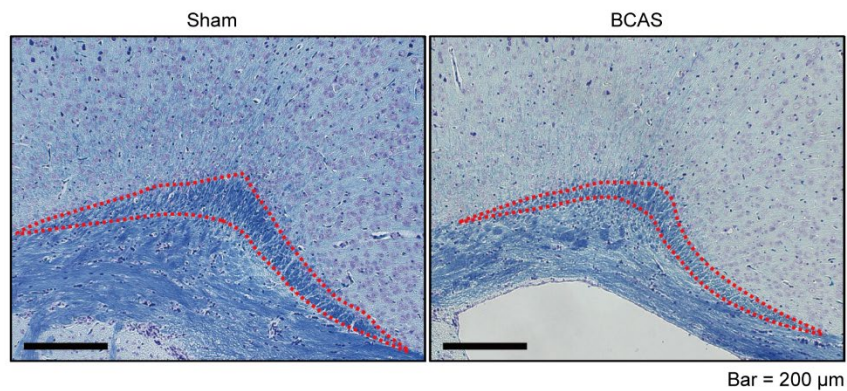

(b) TUNEL assay

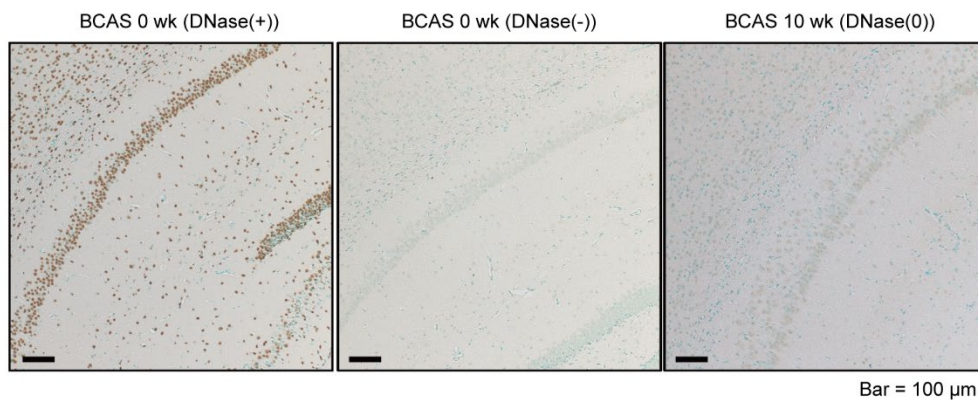

**Supplemental Figure S1. BCAS decreased the area of the cingulum with refraction**

(a) KB staining of the coronal section of the mice brain. The corpus callosum was surrounded by red dot-line. Bar = 200  $\mu$ m. (b) TUNEL assay of the hippocampus at week 0 or 10 after BCAS operation. Assays with DNase treated sections were used as positive controls. Bar = 100  $\mu$ m.

BCAS A $\beta$

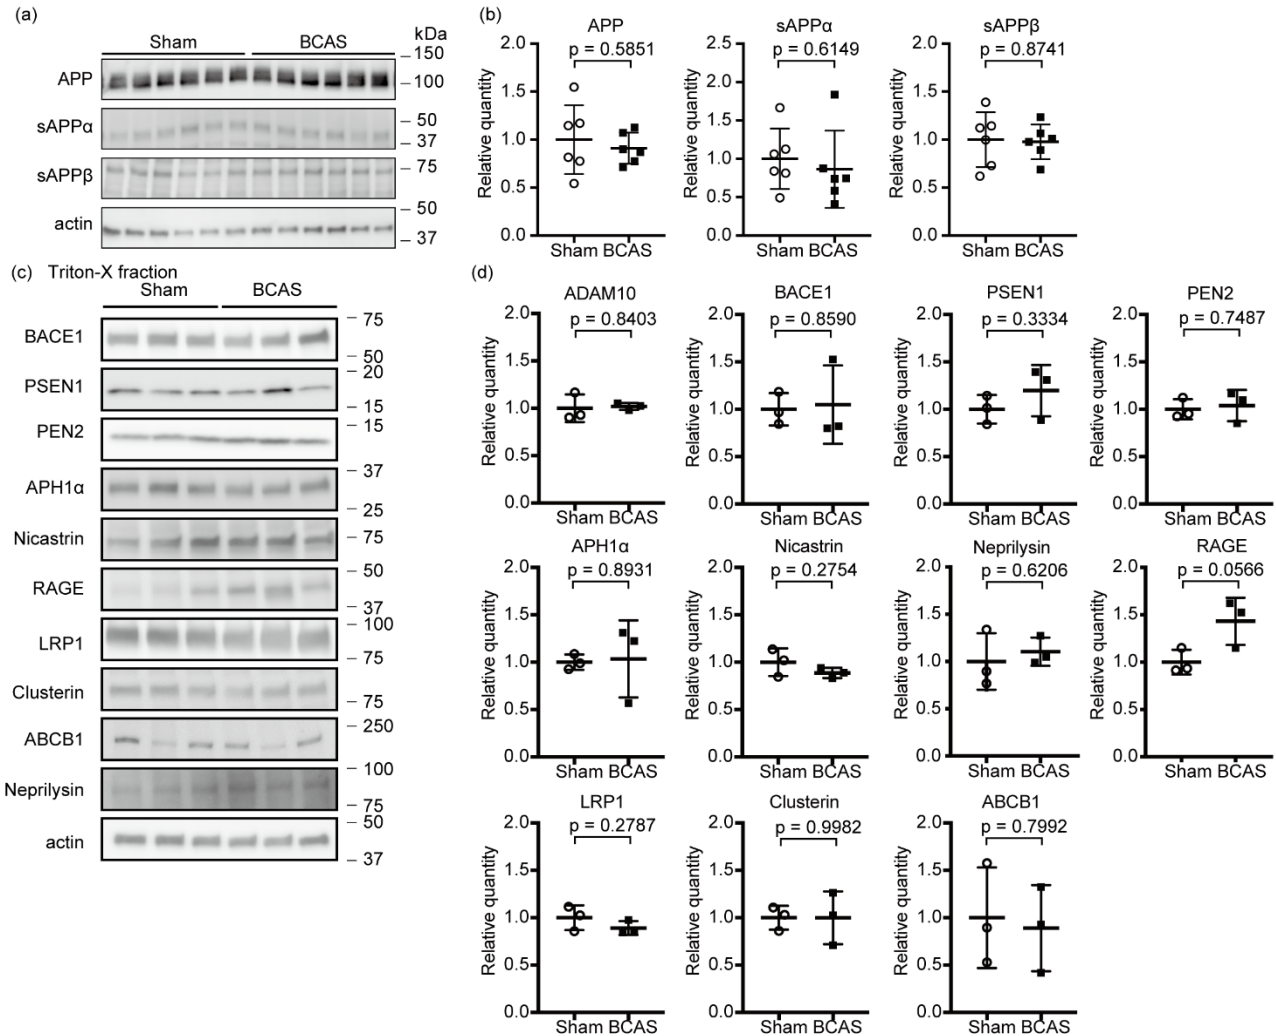

**Supplemental Figure S2.** BCAS had no effect on APP processing and A $\beta$  metabolism in the brain of APP/PS1

mice

(a) Quantifications of APP, sAPP $\alpha$  and sAPP $\beta$  in the Triton-X fraction by western-blot. (b) Quantification of panel

(a). Actin-normalized level of expression of each protein in the Triton-X fraction was normalized to sham = 1. (c)

Quantifications of APP and A $\beta$  processing enzymes in the total brain homogenates by western-blot. (d)

Quantification of panel (d). Relative quantity of each protein to actin expression in Triton-X or PBS fraction was

normalized to sham = 1.

BCAS A $\beta$

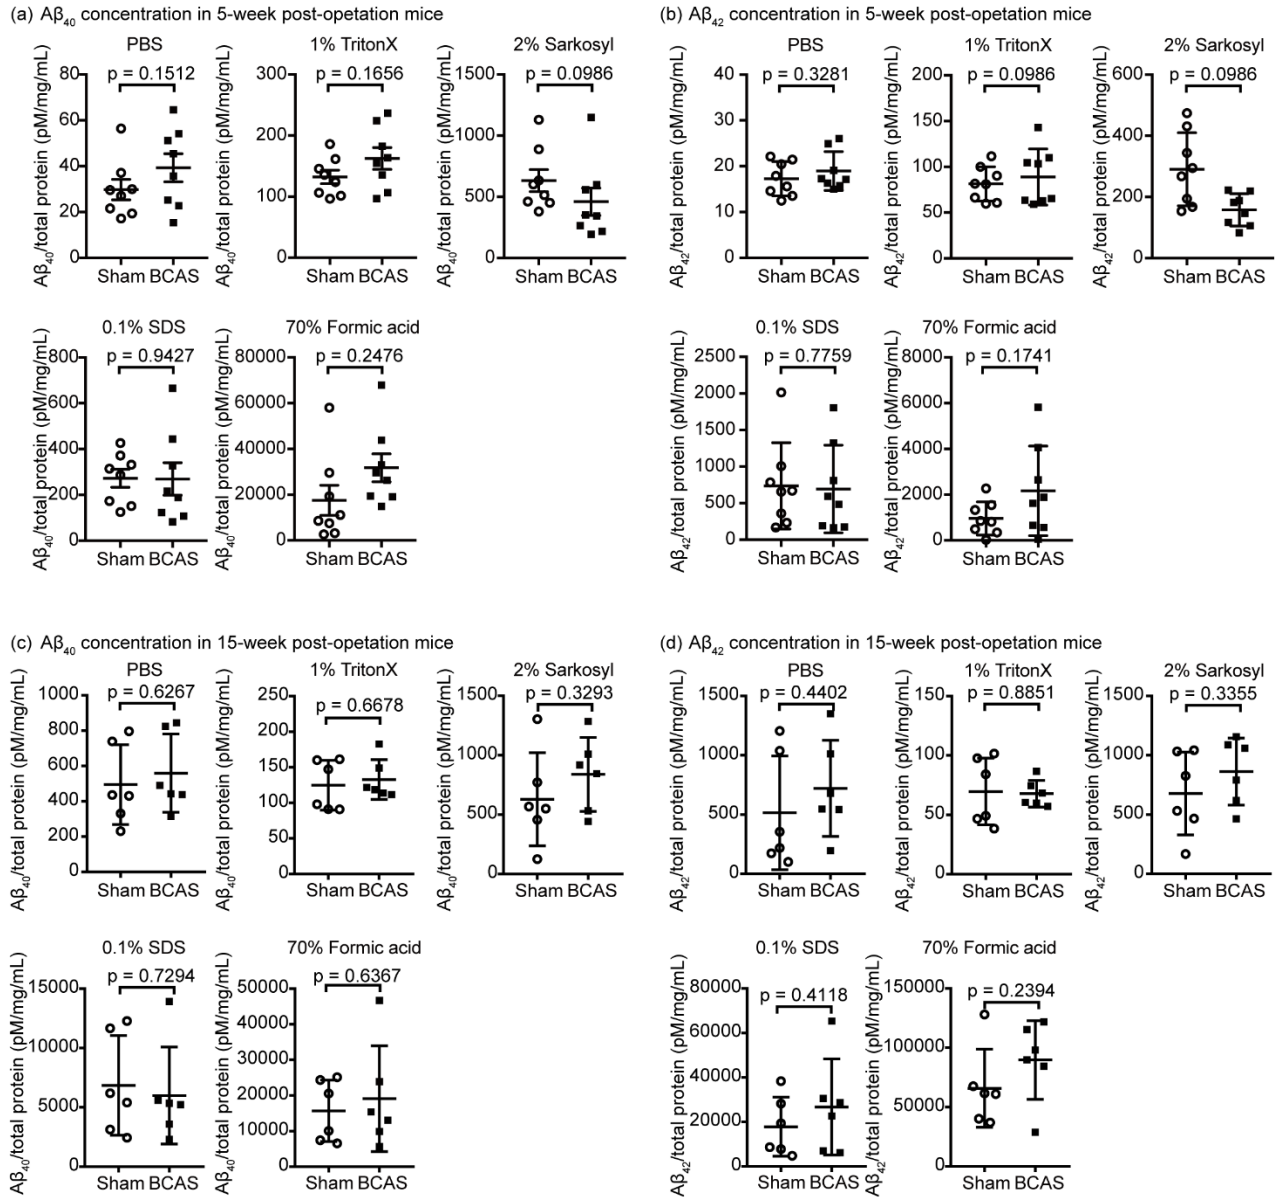

**Supplemental Figure S3.** Serial detergent fractionation assay of sham- or BCAS-operated APP/PS1 mice brain homogenates.

The concentration of A $\beta_{40}$  (a, c) and A $\beta_{42}$  (b, d) in the brain homogenates was measured by ELISA. Samples were obtained at 5 weeks (a, b) and at 15 weeks (c, d) after the BCAS operation. Statistical significance was determined by using a Student's *t*-test.  $n = 8$  (5 weeks) and 6 (15 weeks).

Supplemental Figure S2A

APP

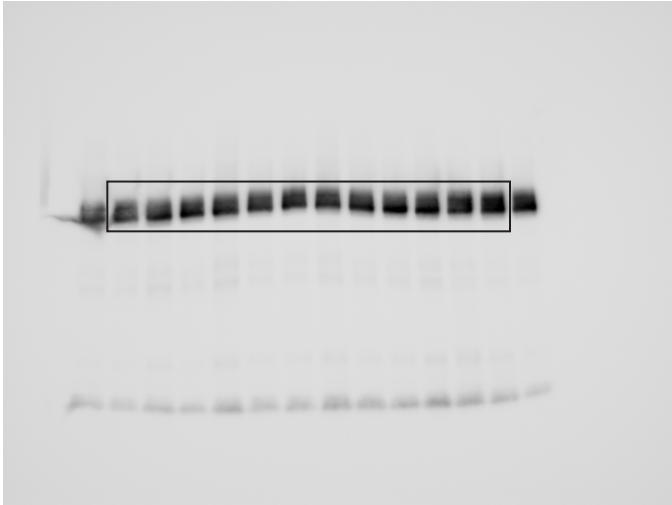

sAPP $\alpha$

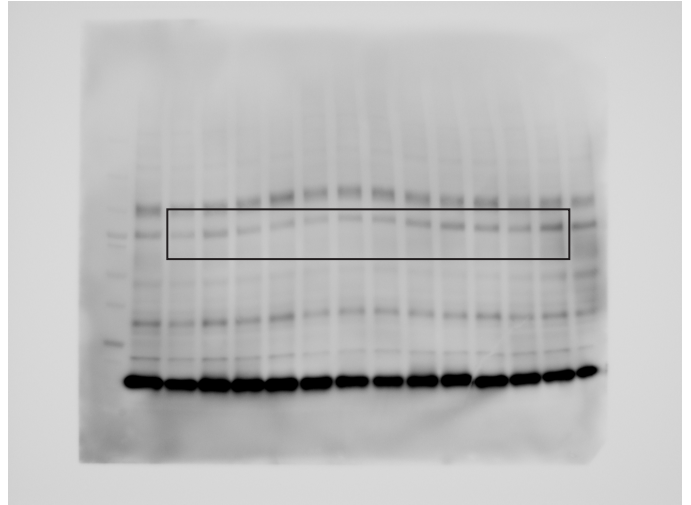

sAPP $\beta$

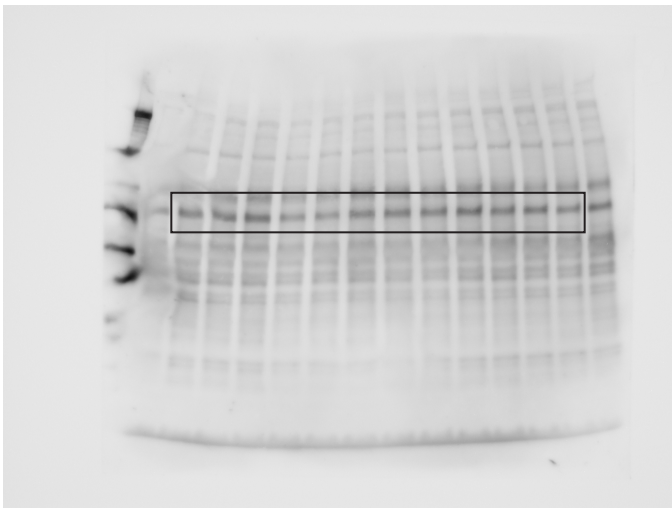

Actin

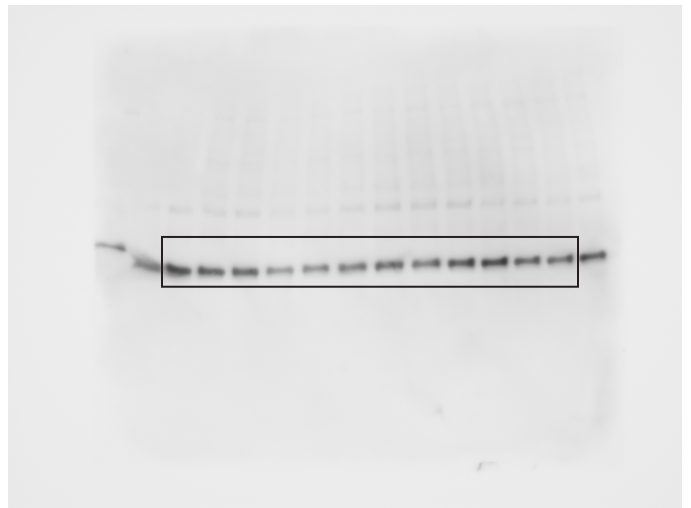

Supplemental Figure S2C

BACE1

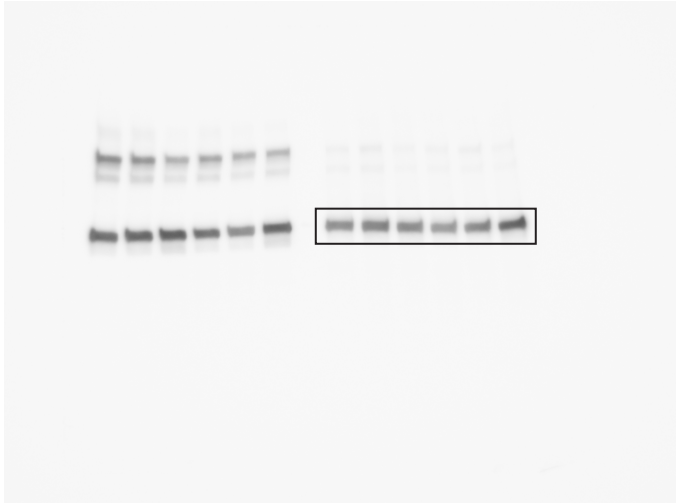

PSEN1

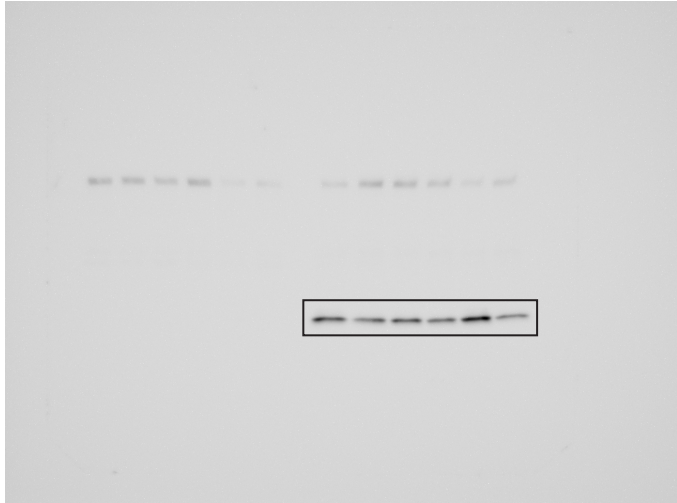

PEN2

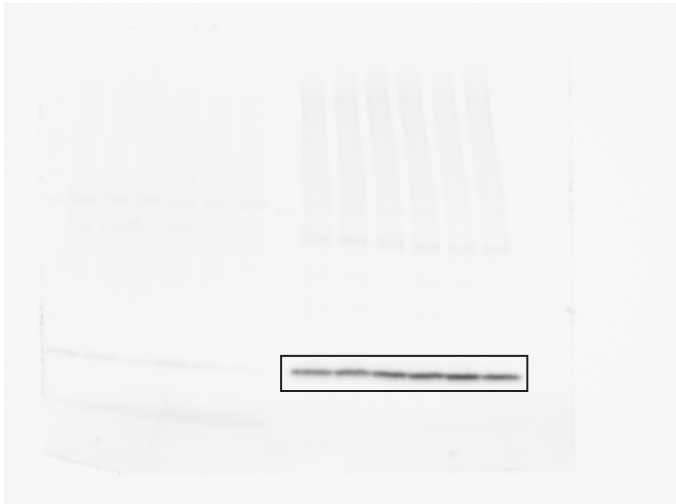

APH1α

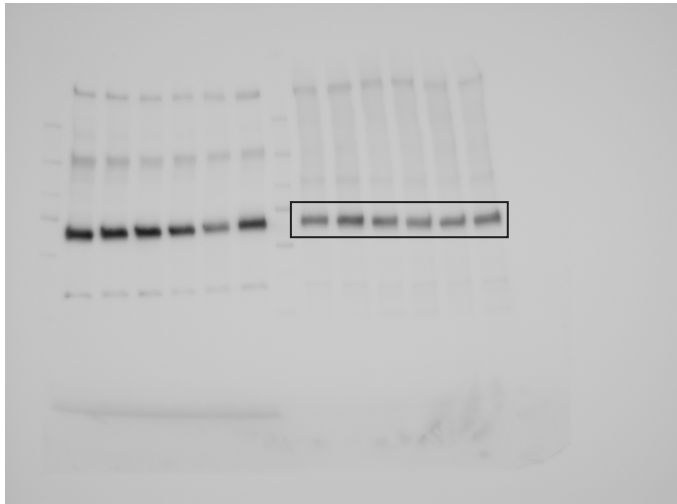

Nicastrin

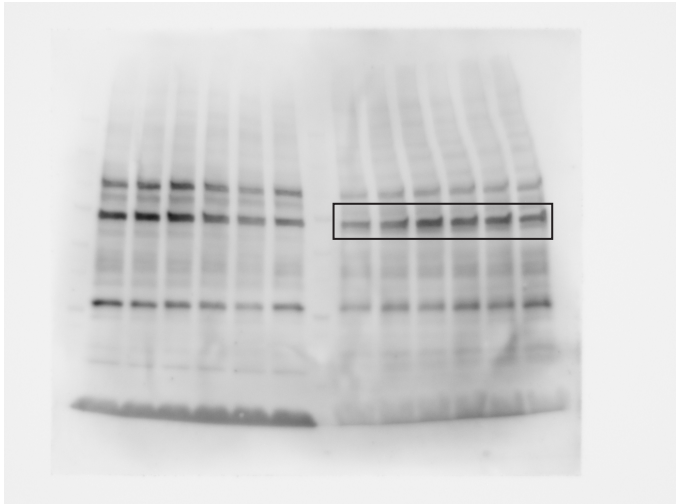

RAGE

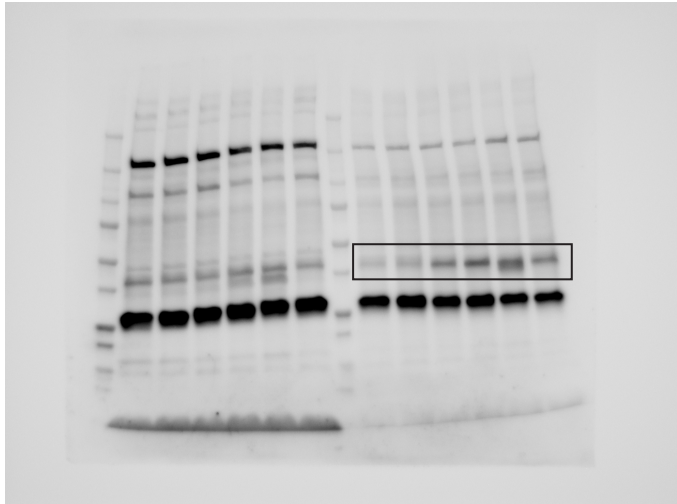

Supplemental Figure S2C

LRP1

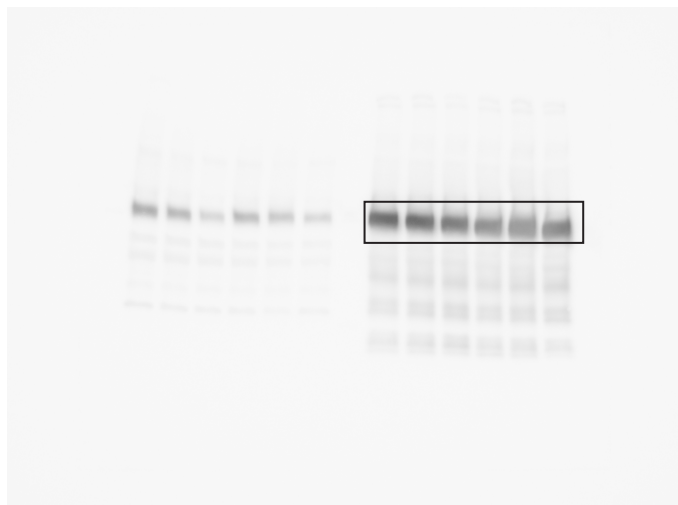

Clusterin

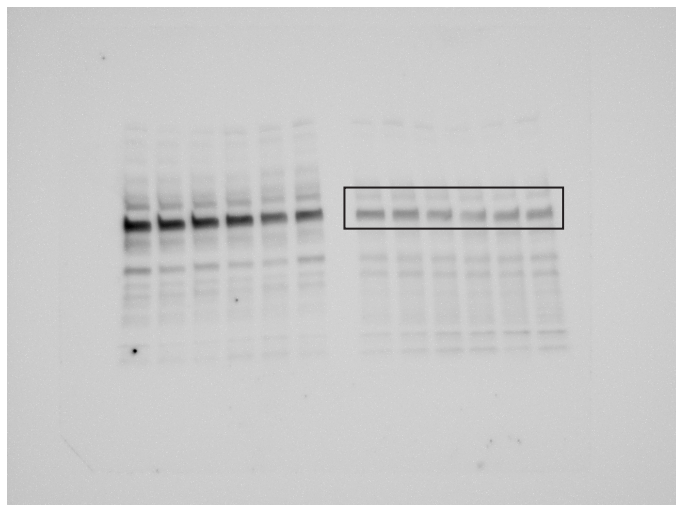

ABCB1

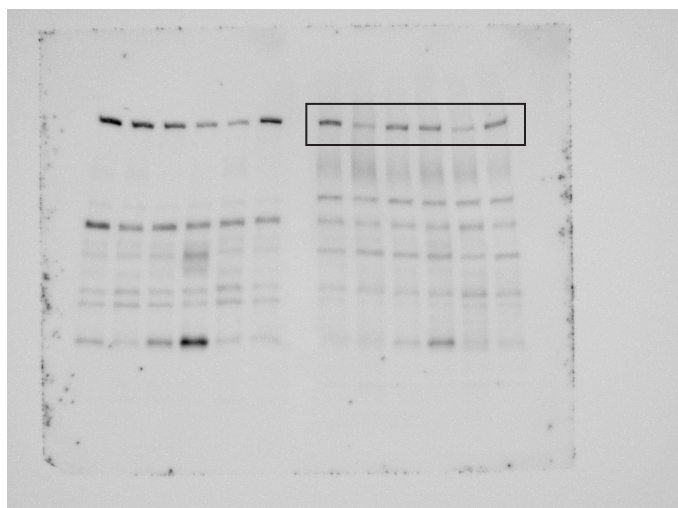

Nephrilysin

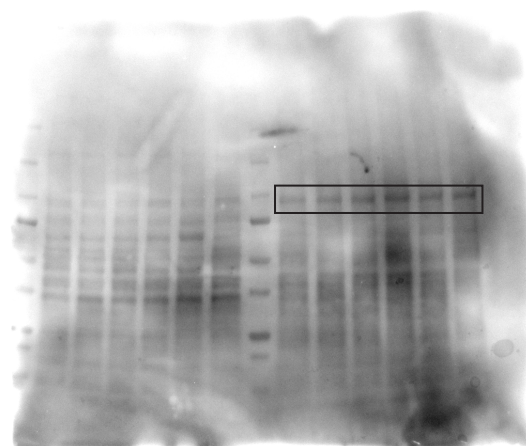

Actin

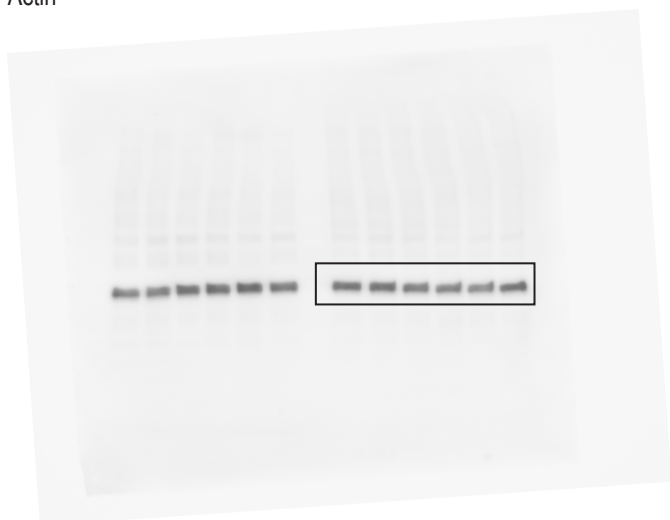

Supplement: 41598_2019_39494_MOESM1_ESM.pdf [file 41598_2019_39494_MOESM1_ESM.pdf]
